# Supplementary material
Source: PubMed Central journal article supplement (PMC8013765)
Supplement: COEP-39-760-s001.pdf [file COEP-39-760-s001.pdf]

# ORIGINAL ARTICLE DISCLOSURE STATEMENT

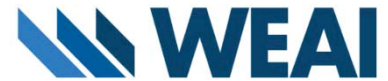

This form or a separate typed disclosure statement must be submitted with your manuscript before it will enter the review process. Answer 'none' if such is the case.

|                  |                                                                                                                          |
|------------------|--------------------------------------------------------------------------------------------------------------------------|
| Name             | Chad Cotti                                                                                                               |
| Manuscript Title | The Relationship between In-Person Voting and COVID-19: Evidence from the Wisconsin Primary                              |
| Submitted To     | <input checked="" type="checkbox"/> <i>Contemporary Economic Policy</i> <input type="checkbox"/> <i>Economic Inquiry</i> |
| Date             | 10-21-2020                                                                                                               |

Each author must disclose if another party had the right to review the paper prior to its circulation.

none

Each author must disclose any paid or unpaid positions that they hold (or any close relative or partner holds) as officer, director, or board member of relevant non-profit organizations, or profit-making entities. A "relevant" organization is one whose policy positions, goals, or financial interests relate to the article.

none

Identify each interested party from whom you (or any close relative or partner) have received financial support of at least \$10,000 in the past three years, in the form of consultant fees, retainers, grants, and the like (including in-kind support, such as providing access to data). If the support in question comes with a non-disclosure obligation, that fact should be stated, along with as much information as the obligation permits. An "interested" party is any individual, group, or organization that has a financial ideological, or political stake related to the article.

none

For any paper involving the collection of data on human subjects the author(s) must disclose whether they have obtained Institutional Review Board (IRB) approval; if no IRB approval was obtained, the reason should be stated.

n/a

# ORIGINAL ARTICLE DISCLOSURE STATEMENT



This form or a separate typed disclosure statement must be submitted with your manuscript before it will enter the review process. Answer 'none' if such is the case.

|                  |                                                                                                                          |
|------------------|--------------------------------------------------------------------------------------------------------------------------|
| Name             | Bryan Engelhardt                                                                                                         |
| Manuscript Title | The Relationship between In-Person Voting and COVID-19: Evidence from the Wisconsin Primary                              |
| Submitted To     | <input checked="" type="checkbox"/> <i>Contemporary Economic Policy</i> <input type="checkbox"/> <i>Economic Inquiry</i> |
| Date             | 11/16/2020                                                                                                               |

Each author must disclose if another party had the right to review the paper prior to its circulation.

None

Each author must disclose any paid or unpaid positions that they hold (or any close relative or partner holds) as officer, director, or board member of relevant non-profit organizations, or profit-making entities. A "relevant" organization is one whose policy positions, goals, or financial interests relate to the article.

None

Identify each interested party from whom you (or any close relative or partner) have received financial support of at least \$10,000 in the past three years, in the form of consultant fees, retainers, grants, and the like (including in-kind support, such as providing access to data). If the support in question comes with a non-disclosure obligation, that fact should be stated, along with as much information as the obligation permits. An "interested" party is any individual, group, or organization that has a financial ideological, or political stake related to the article.

None

For any paper involving the collection of data on human subjects the author(s) must disclose whether they have obtained Institutional Review Board (IRB) approval; if no IRB approval was obtained, the reason should be stated.

N/A

# ORIGINAL ARTICLE DISCLOSURE STATEMENT



This form or a separate typed disclosure statement must be submitted with your manuscript before it will enter the review process. Answer 'none' if such is the case.

|                  |                                                                                                                          |
|------------------|--------------------------------------------------------------------------------------------------------------------------|
| Name             | Joshua Foster                                                                                                            |
| Manuscript Title | The Relationship between In-Person Voting and COVID-19: Evidence from the Wisconsin                                      |
| Submitted To     | <input checked="" type="checkbox"/> <i>Contemporary Economic Policy</i> <input type="checkbox"/> <i>Economic Inquiry</i> |
| Date             | 10-21-2020                                                                                                               |

Each author must disclose if another party had the right to review the paper prior to its circulation.

None.

Each author must disclose any paid or unpaid positions that they hold (or any close relative or partner holds) as officer, director, or board member of relevant non-profit organizations, or profit-making entities. A "relevant" organization is one whose policy positions, goals, or financial interests relate to the article.

None.

Identify each interested party from whom you (or any close relative or partner) have received financial support of at least \$10,000 in the past three years, in the form of consultant fees, retainers, grants, and the like (including in-kind support, such as providing access to data). If the support in question comes with a non-disclosure obligation, that fact should be stated, along with as much information as the obligation permits. An "interested" party is any individual, group, or organization that has a financial ideological, or political stake related to the article.

None.

For any paper involving the collection of data on human subjects the author(s) must disclose whether they have obtained Institutional Review Board (IRB) approval; if no IRB approval was obtained, the reason should be stated.

N/A

# ORIGINAL ARTICLE DISCLOSURE STATEMENT

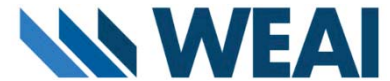

This form or a separate typed disclosure statement must be submitted with your manuscript before it will enter the review process. Answer 'none' if such is the case.

|                  |                                                                                                                          |
|------------------|--------------------------------------------------------------------------------------------------------------------------|
| Name             | Erik Nesson                                                                                                              |
| Manuscript Title | The Relationship between In-Person Voting and COVID-19: Evidence from the Wisconsin Primary                              |
| Submitted To     | <input checked="" type="checkbox"/> <i>Contemporary Economic Policy</i> <input type="checkbox"/> <i>Economic Inquiry</i> |
| Date             | 10/21/2020                                                                                                               |

Each author must disclose if another party had the right to review the paper prior to its circulation.

No one but the authors had the right to review the paper prior to its circulation.

Each author must disclose any paid or unpaid positions that they hold (or any close relative or partner holds) as officer, director, or board member of relevant non-profit organizations, or profit-making entities. A "relevant" organization is one whose policy positions, goals, or financial interests relate to the article.

None.

Identify each interested party from whom you (or any close relative or partner) have received financial support of at least \$10,000 in the past three years, in the form of consultant fees, retainers, grants, and the like (including in-kind support, such as providing access to data). If the support in question comes with a non-disclosure obligation, that fact should be stated, along with as much information as the obligation permits. An "interested" party is any individual, group, or organization that has a financial ideological, or political stake related to the article.

None.

For any paper involving the collection of data on human subjects the author(s) must disclose whether they have obtained Institutional Review Board (IRB) approval; if no IRB approval was obtained, the reason should be stated.

No IRB approval was obtained because our paper does not use human subjects data.

# ORIGINAL ARTICLE DISCLOSURE STATEMENT



This form or a separate typed disclosure statement must be submitted with your manuscript before it will enter the review process. Answer 'none' if such is the case.

|                  |                                                                                                                          |
|------------------|--------------------------------------------------------------------------------------------------------------------------|
| Name             | Paul S. Niekamp                                                                                                          |
| Manuscript Title | The Relationship between In-Person Voting and COVID-19: Evidence from the Wisconsin Primary                              |
| Submitted To     | <input checked="" type="checkbox"/> <i>Contemporary Economic Policy</i> <input type="checkbox"/> <i>Economic Inquiry</i> |
| Date             | 10/21/2020                                                                                                               |

Each author must disclose if another party had the right to review the paper prior to its circulation.

No party had the right to review this paper prior to circulation.

Each author must disclose any paid or unpaid positions that they hold (or any close relative or partner holds) as officer, director, or board member of relevant non-profit organizations, or profit-making entities. A "relevant" organization is one whose policy positions, goals, or financial interests relate to the article.

NA. I hold no such positions.

Identify each interested party from whom you (or any close relative or partner) have received financial support of at least \$10,000 in the past three years, in the form of consultant fees, retainers, grants, and the like (including in-kind support, such as providing access to data). If the support in question comes with a non-disclosure obligation, that fact should be stated, along with as much information as the obligation permits. An "interested" party is any individual, group, or organization that has a financial ideological, or political stake related to the article.

I have received no such financial support.

For any paper involving the collection of data on human subjects the author(s) must disclose whether they have obtained Institutional Review Board (IRB) approval; if no IRB approval was obtained, the reason should be stated.

This paper did not involve the collection of data on human subjects and therefore IRB approval was not obtained.
